# Supplementary material for: Efficacy and tolerability of rivastigmine patch therapy in patients with mild-to-moderate Alzheimer’s dementia associated with minimal and moderate ischemic white matter hyperintensities: A multicenter prospective open-label clinical trial
Source: PLoS One. 2017 Aug 7;12(8):e0182123. doi: 10.1371/journal.pone.0182123 (PMC5546604; doi:10.1371/journal.pone.0182123)
Supplement: S1 Dataset — (XLSX) [file pone.0182123.s001.xlsx]

## Sheet: Sheet1
SubjectID	Group	Age	Sex	Education level	ADAScog	KMMSE	FAB	ADCSADL	CGANPI	CDRSB	MiniZarit	V12	Hypertension	Diabetesmellitus	Hyperlipidemia	HeartDisease	Hypothyroidims	Depresion	Otherdisease	ADAScog_A	KMMSE_A	FAB_A	ADCSADL_A	CGANPI_A	CDRSB_A	MiniZarit_A	ADAScog_B	KMMSE_B	FAB_B	ADCSADL_B	CGANPI_B	CDRSB_B	MiniZarit_B	Adverse event A	Adverse event B	Adverse event C	Adverse event D	Absc	Anor	Dizz	Drug	Dysp	Edem	Epig_d	Epig_p	Frac	Head	Itch	Naus
01-003[id]	1	60	2	0.5	23	15	11	69	2	4	7		0	0	0	0	0	0	0	21	20	12	64	4	3	7	-2	5	1	-5	2	-1	0	itching	rash			0	0	0	0	0	0	0	0	0	0	1	0
01-006[id]	1	80	2	9	20	23	9	62	0	2	28		0	0	0	0	0	0	0	23	18	10	67	0	2	17	3	-5	1	5	0	0	-11					0	0	0	0	0	0	0	0	0	0	0	0
01-007[id]	1	60	2	12	16	19	9	53	13	4.5	17		0	0	0	0	0	0	0	16	17	10	57	6	5	12	0	-2	1	4	-7	0.5	-5	rash				0	0	0	0	0	0	0	0	0	0	0	0
01-008[id]	1	73	2	9	23	20	14	41	11	3	17	1|7|	1	0	0	0	0	0	1	26	22	9	52	3	3	15	3	2	-5	11	-8	0	-2					0	0	0	0	0	0	0	0	0	0	0	0
01-009[id]	1	65	2	6	11	21	16	60	4	3	16	1	1	0	0	0	0	0	0	19	21	12	58	2	3	15	8	0	-4	-2	-2	0	-1	itching				0	0	0	0	0	0	0	0	0	0	1	0
01-013[id]	1	71	1	14	16	22	14	62	1	3	13	1|2|	1	1	0	0	0	0	0	18	24	14	74	1	1.5	46	2	2	0	12	0	-1.5	33	itching	rash			0	0	0	0	0	0	0	0	0	0	1	0
01-015[id]	1	57	1	6	18	21	7	57	2	3	13		0	0	0	0	0	0	0	20	21	11	56	6	3.5	25	2	0	4	-1	4	0.5	12					0	0	0	0	0	0	0	0	0	0	0	0
01-016[id]	1	83	2	0	21	19	7	67	8	2.5	14	1|2|	1	1	0	0	0	0	0	35	17	8	63	6	3	19	14	-2	1	-4	-2	0.5	5					0	0	0	0	0	0	0	0	0	0	0	0
01-017[id]	1	76	1	9	42	12	9	36	10	9	16	1	1	0	0	0	0	0	0	33	16	10	48	0	9	18	-9	4	1	12	-10	0	2					0	0	0	0	0	0	0	0	0	0	0	0
01-022[id]	1	71	2	6	18	21	11	55	34	2.5	44		0	0	0	0	0	0	0	14	22	14	49	33	4	41	-4	1	3	-6	-1	1.5	-3	nausea	vomiting			0	0	0	0	0	0	0	0	0	0	0	1
01-024[id]	1	87	1	4	25	20	12	72	0	1.5	4		0	0	0	0	0	0	0	23	20	8	68	0	1.5	6	-2	0	-4	-4	0	0	2	skin eruption				0	0	0	0	0	0	0	0	0	0	0	0
01-025[id]	1	69	2	12	15	25	14	62	2	2.5	13		0	0	0	0	0	0	0	16	22	16	64	9	3	14	1	-3	2	2	7	0.5	1					0	0	0	0	0	0	0	0	0	0	0	0
01-026[id]	1	74	2	12	19	24	18	66	4	3	29	1|4|	1	0	0	1	0	0	0	14	27	15	70	3	2	25	-5	3	-3	4	-1	-1	-4					0	0	0	0	0	0	0	0	0	0	0	0
01-030[id]	1	77	1	6	16	19	6	47	8	3	39	1|2|	1	1	0	0	0	0	0	17	22	9	47	8	3	39	1	3	3	0	0	0	0					0	0	0	0	0	0	0	0	0	0	0	0
01-039[id]	1	71	1	9	12	25	9	50	18	3	43	2	0	1	0	0	0	0	0	17	24	11	47	18	3	46	5	-1	2	-3	0	0	3					0	0	0	0	0	0	0	0	0	0	0	0
01-040[id]	1	83	2	12	19	23	12	54	6	6	16	1|7|	1	0	0	0	0	0	1	16	20	12	61	7	6	18	-3	-3	0	7	1	0	2					0	0	0	0	0	0	0	0	0	0	0	0
01-042[id]	1	61	1	16	23	20	11	64	8	4.5	3	1|3|	1	0	1	0	0	0	0	20	18	11	58	9	5	20	-3	-2	0	-6	1	0.5	17					0	0	0	0	0	0	0	0	0	0	0	0
01-044[id]	1	72	2	9	17	17	10	61	2	4	11	1	1	0	0	0	0	0	0	18	18	14	56	0	3.5	6	1	1	4	-5	-2	-0.5	-5					0	0	0	0	0	0	0	0	0	0	0	0
02-001[id]	1	78	2	12	16	21	13	73	7	3	67	3	0	0	1	0	0	0	0	21	23	13	76	0	2.5	23	5	2	0	3	-7	-0.5	-44					0	0	0	0	0	0	0	0	0	0	0	0
02-002[id]	1	78	2	5	28	21	5	33	57	3.5	47	7	0	0	0	0	0	0	1	29	16	4	33	28	5	34	1	-5	-1	0	-29	1.5	-13					0	0	0	0	0	0	0	0	0	0	0	0
03-004[id]	1	70	2	2	22	17	9	60	6	4.5	8		0	0	0	0	0	0	0	22	20	6	58	10	4.5	11	0	3	-3	-2	4	0	3					0	0	0	0	0	0	0	0	0	0	0	0
03-007[id]	1	80	2	12	31	16	11	34	12	14	25	7	0	0	0	0	0	0	1	26	19	14	39	23	14	35	-5	3	3	5	11	0	10					0	0	0	0	0	0	0	0	0	0	0	0
03-009[id]	1	80	2	4	30	13	8	52	27	5	18	1|7|	1	0	0	0	0	0	1	21	9	8	15	20	5	24	-9	-4	0	-37	-7	0	6					0	0	0	0	0	0	0	0	0	0	0	0
03-011[id]	1	80	2	6	21	19	8	72	25	5	28	4	0	0	0	1	0	0	0	20	24	11	59	34	5	10	-1	5	3	-13	9	0	-18					0	0	0	0	0	0	0	0	0	0	0	0
03-012[id]	1	81	1	6	16	19	12	64	0	4	18		0	0	0	0	0	0	0	22	19	7	55	22	4	19	6	0	-5	-9	22	0	1					0	0	0	0	0	0	0	0	0	0	0	0
04-001[id]	1	77	2	5	28	17	10	64	1	3.5	0	1|2|4|7|	1	1	0	1	0	0	1	31	16	4	66	2	6.5	3	3	-1	-6	2	1	3	3					0	0	0	0	0	0	0	0	0	0	0	0
04-002[id]	1	85	2	0	40	12	5	12	8	14	42	7	0	0	0	0	0	0	1	37	12	6	15	8	14	40	-3	0	1	3	0	0	-2	itching	itching			0	0	0	0	0	0	0	0	0	0	1	0
04-003[id]	1	73	1	6	37	17	10	28	32	6	37	1|2|3|	1	1	1	0	0	0	0	33	22	13	45	0	7	15	-4	5	3	17	-32	1	-22	Abscess				1	0	0	0	0	0	0	0	0	0	0	0
04-014[id]	1	74	1	14	28	20	10	61	13	5	20	2|4|	0	1	0	1	0	0	0	26	22	10	63	11	4.5	20	-2	2	0	2	-2	-0.5	0					0	0	0	0	0	0	0	0	0	0	0	0
05-007[id]	1	75	1	12	13	26	16	73	11	0.5	0	1|2|	1	1	0	0	0	0	0	9	26	15	67	1	0.5	4	-4	0	-1	-6	-10	0	4	itching				0	0	0	0	0	0	0	0	0	0	1	0
07-001[id]	1	74	1	5	18	20	7	41	0	2.5	10	7	0	0	0	0	0	0	1	17	20	10	64	0	2.5	5	-1	0	3	23	0	0	-5					0	0	0	0	0	0	0	0	0	0	0	0
07-005[id]	1	69	2	1	20	18	8	69	0	5	8	1|3|6|	1	0	1	0	0	1	0	16	19	10	72	7	5	14	-4	1	2	3	7	0	6					0	0	0	0	0	0	0	0	0	0	0	0
07-006[id]	1	66	2	8	18	26	15	58	4	3	25	1|3|4|7|	1	0	1	1	0	0	1	18	24	13	53	1	3	46	0	-2	-2	-5	-3	0	21					0	0	0	0	0	0	0	0	0	0	0	0
07-007[id]	1	70	2	10	18	20	13	67	6	2.5	9	4|7|	0	0	0	1	0	0	1	18	19	7	74	6	2.5	8	0	-1	-6	7	0	0	-1	rash				0	0	0	0	0	0	0	0	0	0	0	0
07-010[id]	1	59	2	12	26	19	8	67	1	5	34		0	0	0	0	0	0	0	23	17	9	64	2	5	28	-3	-2	1	-3	1	0	-6					0	0	0	0	0	0	0	0	0	0	0	0
08-002[id]	1	68	1	7	16	24	11	70	7	3.5	6		0	0	0	0	0	0	0	15	24	12	74	0	0.5	6	-1	0	1	4	-7	-3	0					0	0	0	0	0	0	0	0	0	0	0	0
09001[id]	1	80	2	0	20	21	10	71	3	2	8	1|7|	1	0	0	0	0	0	1	18	21	13	69	0	1.5	4	-2	0	3	-2	-3	-0.5	-4	upper respiratory infection	zoster	itching		0	0	0	0	0	0	0	0	0	0	1	0
09005[id]	1	69	2	0.5	22	19	14	65	4	3	3	1|7|	1	0	0	0	0	0	1	23	19	13	68	4	3	5	1	0	-1	3	0	0	2					0	0	0	0	0	0	0	0	0	0	0	0
10-009[id]	1	67	2	6	14	26	12	67	3	3	13	5	0	0	0	0	1	0	0	12	27	13	63	0	2.5	15	-2	1	1	-4	-3	-0.5	2	Nausea	Vomiting			0	0	0	0	0	0	0	0	0	0	0	1
10-010[id]	1	56	2	12	14	23	9	73	19	3.5	34	7	0	0	0	0	0	0	1	20	19	12	67	42	4	38	6	-4	3	-6	23	0.5	4	nausea	Vomiting			0	0	0	0	0	0	0	0	0	0	0	1
10-013[id]	1	84	2	0	35	11	3	54	42	8	40	1	1	0	0	0	0	0	0	27	12	1	69	3	7.5	21	-8	1	-2	15	-39	-0.5	-19	Edema				0	0	0	0	0	1	0	0	0	0	0	0
10-014[id]	1	62	2	6	23	22	9	53	12	4	0	1	1	0	0	0	0	0	0	13	26	15	54	2	2.5	17	-10	4	6	1	-10	-1.5	17					0	0	0	0	0	0	0	0	0	0	0	0
10-016[id]	1	79	2	6	10	26	9	67	0	3	0	1	1	0	0	0	0	0	0	15	29	14	71	0	1.5	0	5	3	5	4	0	-1.5	0					0	0	0	0	0	0	0	0	0	0	0	0
10-017[id]	1	71	2	9	16	21	10	63	3	3.5	3	2	0	1	0	0	0	0	0	20	24	14	65	1	3.5	29	4	3	4	2	-2	0	26					0	0	0	0	0	0	0	0	0	0	0	0
10-020[id]	1	67	2	3	27	15	7	64	2	7.5	29	7	0	0	0	0	0	0	1	38	14	11	54	15	9	22	11	-1	4	-10	13	1.5	-7					0	0	0	0	0	0	0	0	0	0	0	0
10-021[id]	1	79	2	0	30	15	7	57	15	8	18	1|2|3|7|	1	1	1	0	0	0	1	27	15	9	57	6	8	20	-3	0	2	0	-9	0	2					0	0	0	0	0	0	0	0	0	0	0	0
10-023[id]	1	59	2	3	10	24	14	69	3	3.5	3	7	0	0	0	0	0	0	1	10	27	15	71	0	3.5	0	0	3	1	2	-3	0	-3					0	0	0	0	0	0	0	0	0	0	0	0
10-024[id]	1	61	2	6	11	24	11	74	1	3	2	7	0	0	0	0	0	0	1	11	23	10	74	1	3.5	2	0	-1	-1	0	0	0.5	0					0	0	0	0	0	0	0	0	0	0	0	0
10-025[id]	1	56	1	12	13	24	12	74	8	2.5	11		0	0	0	0	0	0	0	23	21	13	60	26	4.5	39	10	-3	1	-14	18	2	28	itching				0	0	0	0	0	0	0	0	0	0	1	0
14_004[id]	1	61	2	6	24	17	11	73	5	3.5	2	5	0	0	0	0	1	0	0	17	21	12	70	0	3	2	-7	4	1	-3	-5	-0.5	0					0	0	0	0	0	0	0	0	0	0	0	0
14_005[id]	1	77	2	6	21	18	9	67	0	4	4	1|2|	1	1	0	0	0	0	0	26	18	13	61	3	4	6	5	0	4	-6	3	0	2	rash				0	0	0	0	0	0	0	0	0	0	0	0
14_010[id]	1	67	2	6	22	20	12	67	14	4	27	3	0	0	1	0	0	0	0	20	24	13	69	12	4	37	-2	4	1	2	-2	0	10					0	0	0	0	0	0	0	0	0	0	0	0
14_014[id]	1	71	2	6	20	21	12	66	10	5.5	9	1|2|	1	1	0	0	0	0	0	15	21	11	70	19	5.5	17	-5	0	-1	4	9	0	8	itching	rash			0	0	0	0	0	0	0	0	0	0	0	0
14_015[id]	1	76	1	12	22	16	10	59	9	6	19		0	0	0	0	0	0	0	20	22	13	43	10	6	36	-2	6	3	-16	1	0	17					0	0	0	0	0	0	0	0	0	0	0	0
14_017[id]	1	80	2	6	27	17	11	57	12	6.5	35	2|7|	0	1	0	0	0	0	1	25	14	9	68	18	6.5	36	-2	-3	-2	11	6	0	1					0	0	0	0	0	0	0	0	0	0	0	0
14_020[id]	1	77	2	4	27	16	7	64	15	5.5	21	7	0	0	0	0	0	0	1	42	16	7	64	0	5.5	3	15	0	0	0	-15	0	-18					0	0	0	0	0	0	0	0	0	0	0	0
14-001[id]	1	73	2	6	33	13	7	64	0	5	15	7	0	0	0	0	0	0	1	43	11	6	64	0	5	15	10	-2	-1	0	0	0	0					0	0	0	0	0	0	0	0	0	0	0	0
14-002[id]	1	82	1	6	19	20	11	56	8	2.5	20	7	0	0	0	0	0	0	1	15	24	8	10	0	2.5	4	-4	4	-3	-46	-8	0	-16					0	0	0	0	0	0	0	0	0	0	0	0
15-002[id]	1	67	2	6	16	25	16	72	5	1	6	1|3|4|6|	1	0	1	1	0	1	0	15	25	17	69	1	1.5	12	-1	0	1	-3	-4	0.5	6					0	0	0	0	0	0	0	0	0	0	0	0
15-004[id]	1	71	1	9	19	23	13	69	1	3.5	13	1|2|	1	1	0	0	0	0	0	13	25	13	71	0	3.5	21	-6	2	0	2	-1	0	8					0	0	0	0	0	0	0	0	0	0	0	0
15-006[id]	1	66	2	16	15	24	16	75	2	1.5	15	6	0	0	0	0	0	1	0	14	22	15	76	0	2.5	0	-1	-2	-1	1	-2	1	-15					0	0	0	0	0	0	0	0	0	0	0	0
15-007[id]	1	81	2	0.5	19	18	10	66	5	4	6	3	0	0	1	0	0	0	0	24	13	11	67	7	4.5	11	5	-5	1	1	2	0.5	5	nausea	vomiting	epigastric discomfort		0	0	0	0	0	0	1	0	0	0	0	1
15-009[id]	1	67	2	9	17	21	15	76	3	2.5	8	3|6|	0	0	1	0	0	1	0	13	21	16	74	0	2.5	11	-4	0	1	-2	-3	0	3					0	0	0	0	0	0	0	0	0	0	0	0
15-012[id]	1	68	2	16	14	25	15	68	7	4	16	2|3|5|	0	1	1	0	1	0	0	16	22	15	71	5	4	41	2	-3	0	3	-2	0	25					0	0	0	0	0	0	0	0	0	0	0	0
15-014[id]	1	66	2	6	20	21	13	64	8	3	11		0	0	0	0	0	0	0	20	22	11	66	6	3	15	0	1	-2	2	-2	0	4					0	0	0	0	0	0	0	0	0	0	0	0
15-018[id]	1	76	2	16	21	25	15	58	7	3	2	7	0	0	0	0	0	0	1	19	21	14	59	7	3.5	5	-2	-4	-1	1	0	0.5	3					0	0	0	0	0	0	0	0	0	0	0	0
16-001[id]	1	81	1	9	16	26	14	70	5	2.5	22	1	1	0	0	0	0	0	0	22	23	17	63	1	3.5	21	6	-3	3	-7	-4	1	-1					0	0	0	0	0	0	0	0	0	0	0	0
16-004[id]	1	69	1	12	20	18	16	65	45	5	21	1|2|	1	1	0	0	0	0	0	21	20	16	77	0	4.5	9	1	2	0	12	-45	-0.5	-12					0	0	0	0	0	0	0	0	0	0	0	0
16-006[id]	1	72	2	6	23	20	13	66	11	5	12	2|7|	0	1	0	0	0	0	1	27	17	13	67	1	5	6	4	-3	0	1	-10	0	-6					0	0	0	0	0	0	0	0	0	0	0	0
16-007[id]	1	67	2	3	12	25	14	55	8	4	38	1|2|7|	1	1	0	0	0	0	1	11	26	15	70	12	4.5	19	-1	1	1	15	4	0.5	-19					0	0	0	0	0	0	0	0	0	0	0	0
18-003[id]	1	77	1	11	20	21	5	63	2	3.5	18	1	1	0	0	0	0	0	0	19	21	13	63	0	3.5	17	-1	0	8	0	-2	0	-1	rash	headache			0	0	0	0	0	0	0	0	0	1	0	0
18-004[id]	1	84	2	0.5	12	22	13	61	4	1	15	1|3|	1	0	1	0	0	0	0	15	25	17	64	2	1	18	3	3	4	3	-2	0	3					0	0	0	0	0	0	0	0	0	0	0	0
18-005[id]	1	76	2	6	23	17	7	46	39	4.5	45	2|4|7|	0	1	0	1	0	0	1	16	21	12	59	13	1.5	53	-7	4	5	13	-26	-3	8					0	0	0	0	0	0	0	0	0	0	0	0
18-013[id]	1	89	1	6	19	19	10	43	19	3	16	4	0	0	0	1	0	0	0	17	22	10	36	4	3	19	-2	3	0	-7	-15	0	3	Drug induced Bradycardia	headache			0	0	0	1	0	0	0	0	0	1	0	0
18-014[id]	1	78	1	9	16	15	7	65	2	2	26	1|2|3|6|	1	1	1	0	0	1	0	14	24	12	68	0	1	24	-2	9	5	3	-2	-1	-2	paresthesia				0	0	0	0	0	0	0	0	0	0	0	0
18-016[id]	1	80	1	6	16	24	15	67	1	2.5	24	1|7|	1	0	0	0	0	0	1	19	23	15	72	4	2.5	13	3	-1	0	5	3	0	-11	shoulder pain				0	0	0	0	0	0	0	0	0	0	0	0
18-018[id]	1	78	2	6	35	11	4	34	11	11	21	1|2|3|	1	1	1	0	0	0	0	37	13	3	39	44	11	24	2	2	-1	5	33	0	3					0	0	0	0	0	0	0	0	0	0	0	0
18-019[id]	1	83	2	1	27	14	3	40	7	5	4	1|3|7|	1	0	1	0	0	0	1	27	15	5	56	5	5	29	0	1	2	16	-2	0	25	itching				0	0	0	0	0	0	0	0	0	0	1	0
18-021[id]	1	74	2	4	29	17	11	36	3	1.5	26	2|7|	0	1	0	0	0	0	1	16	22	5	65	3	1.5	31	-13	5	-6	29	0	0	5					0	0	0	0	0	0	0	0	0	0	0	0
19-004[id]	1	84	2	9	29	24	11	59	17	5.5	15	1|2|3|	1	1	1	0	0	0	0	30	23	11	66	15	5.5	6	1	-1	0	7	-2	0	-9	Dizziness				0	0	1	0	0	0	0	0	0	0	0	0
19-008[id]	1	76	2	1	18	24	8	68	5	2.5	29	1	1	0	0	0	0	0	0	15	24	11	69	1	1.5	1	-3	0	3	1	-4	-1	-28					0	0	0	0	0	0	0	0	0	0	0	0
20-002[id]	1	77	2	0.5	36	10	8	68	2	4	10		0	0	0	0	0	0	0	38	13	4	55	0	4.5	30	2	3	-4	-13	-2	0.5	20					0	0	0	0	0	0	0	0	0	0	0	0
20-006[id]	1	76	2	0.5	35	14	7	63	0	3	4		0	0	0	0	0	0	0	32	19	6	62	7	3.5	9	-3	5	-1	-1	7	0.5	5	vomiting	nausea	dizziness	vomiting	0	0	1	0	0	0	0	0	0	0	0	1
20-007[id]	1	75	2	12	25	19	12	54	32	4.5	51		0	0	0	0	0	0	0	22	20	12	63	6	4	34	-3	1	0	9	-26	-0.5	-17					0	0	0	0	0	0	0	0	0	0	0	0
20-008[id]	1	66	2	2	12	23	12	71	13	1.5	17	7	0	0	0	0	0	0	1	12	25	14	73	5	1.5	21	0	2	2	2	-8	0	4	nausea				0	0	0	0	0	0	0	0	0	0	0	1
20-011[id]	1	78	1	12	37	20	7	47	21	4.5	26	1|4|	1	0	0	1	0	0	0	14	25	16	62	11	2	18	-23	5	9	15	-10	-2.5	-8					0	0	0	0	0	0	0	0	0	0	0	0
20-016[id]	1	82	1	16	17	22	16	39	4	3	15	2	0	1	0	0	0	0	0	27	22	16	40	12	3.5	8	10	0	0	1	8	0.5	-7					0	0	0	0	0	0	0	0	0	0	0	0
21-005[id]	1	71	2	3	18	20	5	53	16	4.5	27	1	1	0	0	0	0	0	0	10	23	13	70	0	1.5	0	-8	3	8	17	-16	-3	-27					0	0	0	0	0	0	0	0	0	0	0	0
21-009[id]	1	66	2	4	9	24	14	73	0	1.5	0	5	0	0	0	0	1	0	0	6	28	16	75	0	0.5	0	-3	4	2	2	0	-1	0					0	0	0	0	0	0	0	0	0	0	0	0
21-010[id]	1	77	2	0.5	25	12	6	61	0	4	9	1	1	0	0	0	0	0	0	22	17	6	63	26	4.5	28	-3	5	0	2	26	0.5	19					0	0	0	0	0	0	0	0	0	0	0	0
21-013[id]	1	81	1	6	33	26	10	57	8	4	0		0	0	0	0	0	0	0	16	26	15	63	3	2.5	0	-17	0	5	6	-5	-1.5	0					0	0	0	0	0	0	0	0	0	0	0	0
21-015[id]	1	75	1	9	35	13	9	34	47	9	52	1|2|3|4|5|6|	1	1	1	1	1	1	0	25	20	8	50	35	7	51	-10	7	-1	16	-12	-2	-1					0	0	0	0	0	0	0	0	0	0	0	0
21-016[id]	1	74	2	2	20	20	10	70	0	1.5	13	1|2|3|	1	1	1	0	0	0	0	19	19	11	71	0	1.5	19	-1	-1	1	1	0	0	6					0	0	0	0	0	0	0	0	0	0	0	0
21-021[id]	1	75	2	8	26	17	4	61	4	1.5	5	3|4|	0	0	1	1	0	0	0	22	18	5	65	2	1.5	13	-4	1	1	4	-2	0	8					0	0	0	0	0	0	0	0	0	0	0	0
21-024[id]	1	77	2	0	33	16	6	48	24	4	31	4	0	0	0	1	0	0	0	31	16	6	45	13	4	23	-2	0	0	-3	-11	0	-8					0	0	0	0	0	0	0	0	0	0	0	0
21-031[id]	1	80	2	0.5	22	17	7	59	3	3.5	38		0	0	0	0	0	0	0	27	12	7	47	8	4	26	5	-5	0	-12	5	0.5	-12					0	0	0	0	0	0	0	0	0	0	0	0
22-004[id]	1	72	2	6	21	20	13	60	1	2.5	13		0	0	0	0	0	0	0	20	22	14	64	3	1.5	7	-1	2	1	4	2	-1	-6					0	0	0	0	0	0	0	0	0	0	0	0
22-006[id]	1	86	1	6	29	18	6	67	0	2.5	20		0	0	0	0	0	0	0	32	16	7	56	1	2.5	46	3	-2	1	-11	1	0	26					0	0	0	0	0	0	0	0	0	0	0	0
22-007[id]	1	61	2	12	27	22	10	63	20	2	9	1|3|	1	0	1	0	0	0	0	25	21	8	63	17	3.5	14	-2	-1	-2	0	-3	1.5	5					0	0	0	0	0	0	0	0	0	0	0	0
22-008[id]	1	61	2	18	27	18	14	52	15	2.5	68		0	0	0	0	0	0	0	36	16	11	50	9	3.5	45	9	-2	-3	-2	-6	1	-23					0	0	0	0	0	0	0	0	0	0	0	0
22-010[id]	1	82	2	6	33	17	8	58	10	3.5	14	1	1	0	0	0	0	0	0	31	16	12	62	2	4.5	18	-2	-1	4	4	-8	1	4					0	0	0	0	0	0	0	0	0	0	0	0
22-012[id]	1	85	1	9	25	22	14	46	6	4.5	11	1	1	0	0	0	0	0	0	21	22	15	48	2	2	9	-4	0	1	2	-4	-2.5	-2					0	0	0	0	0	0	0	0	0	0	0	0
22-014[id]	1	53	2	6	32	16	3	75	0	3	0	1|2|	1	1	0	0	0	0	0	42	15	9	75	0	3.5	0	10	-1	6	0	0	0.5	0	urticaria				0	0	0	0	0	0	0	0	0	0	0	0
22-015[id]	1	77	2	6	28	21	12	64	0	1	2	1	1	0	0	0	0	0	0	30	23	11	70	0	1	1	2	2	-1	6	0	0	-1					0	0	0	0	0	0	0	0	0	0	0	0
22-017[id]	1	65	1	16	25	25	16	70	3	2.5	14	7	0	0	0	0	0	0	1	24	23	18	72	0	1.5	3	-1	-2	2	2	-3	-1	-11					0	0	0	0	0	0	0	0	0	0	0	0
22-019[id]	1	79	2	4	27	18	11	53	18	3.5	19		0	0	0	0	0	0	0	18	21	10	66	14	4.5	18	-9	3	-1	13	-4	1	-1	rash	itching			0	0	0	0	0	0	0	0	0	0	1	0
22-020[id]	1	82	1	7	45	13	6	35	45	11	33	7	0	0	0	0	0	0	1	41	14	5	35	41	10	47	-4	1	-1	0	-4	-1	14					0	0	0	0	0	0	0	0	0	0	0	0
22-023[id]	1	53	2	6	23	26	14	69	0	2.5	11		0	0	0	0	0	0	0	16	27	14	67	5	2	21	-7	1	0	-2	5	-0.5	10	itching				0	0	0	0	0	0	0	0	0	0	1	0
23-002[id]	1	79	1	0	19	19	12	59	6	3.5	11	1|2|	1	1	0	0	0	0	0	25	15	7	63	6	3.5	9	6	-4	-5	4	0	0	-2	itching				0	0	0	0	0	0	0	0	0	0	1	0
23-003[id]	1	65	2	6	18	24	9	68	0	2.5	15	3	0	0	1	0	0	0	0	20	25	10	75	0	2.5	25	2	1	1	7	0	0	10	Headache				0	0	0	0	0	0	0	0	0	1	0	0
23-004[id]	1	75	1	9	38	14	10	59	38	4	22	3|7|	0	0	1	0	0	0	1	33	19	6	61	41	6	57	-5	5	-4	2	3	2	35					0	0	0	0	0	0	0	0	0	0	0	0
23-006[id]	1	57	1	13	20	23	13	67	8	3.5	15		0	0	0	0	0	0	0	21	19	13	67	6	3.5	15	1	-4	0	0	-2	0	0					0	0	0	0	0	0	0	0	0	0	0	0
23-009[id]	1	78	2	3	23	15	9	63	3	2.5	6	7	0	0	0	0	0	0	1	22	17	9	67	2	2.5	8	-1	2	0	4	-1	0	2	nausea	anorexia			0	1	0	0	0	0	0	0	0	0	0	1
23-012[id]	1	77	2	9	28	16	7	69	0	2.5	24	7	0	0	0	0	0	0	1	28	17	7	68	5	2.5	24	0	1	0	-1	5	0	0					0	0	0	0	0	0	0	0	0	0	0	0
23-013[id]	1	74	2	9	28	16	2	43	46	5.5	13	2	0	1	0	0	0	0	0	22	19	5	56	46	5	15	-6	3	3	13	0	-0.5	2					0	0	0	0	0	0	0	0	0	0	0	0
23-020[id]	1	74	2	6	38	10	4	56	16	6	20		0	0	0	0	0	0	0	38	9	3	57	3	6	20	0	-1	-1	1	-13	0	0					0	0	0	0	0	0	0	0	0	0	0	0
23-021[id]	1	66	2	0	9	25	10	73	8	2.5	6		0	0	0	0	0	0	0	12	25	10	75	0	2.5	4	3	0	0	2	-8	0	-2					0	0	0	0	0	0	0	0	0	0	0	0
23-022[id]	1	59	1	6	30	19	11	69	23	2.5	25		0	0	0	0	0	0	0	25	26	10	68	23	2.5	25	-5	7	-1	-1	0	0	0					0	0	0	0	0	0	0	0	0	0	0	0
23-023[id]	1	82	2	6	28	23	8	6	28	3.5	60		0	0	0	0	0	0	0	32	21	6	17	1	3.5	59	4	-2	-2	11	-27	0	-1					0	0	0	0	0	0	0	0	0	0	0	0
23-027[id]	1	69	2	12	18	24	12	67	6	2.5	15		0	0	0	0	0	0	0	25	26	13	68	0	2.5	1	7	2	1	1	-6	0	-14					0	0	0	0	0	0	0	0	0	0	0	0
24001[id]	1	73	2	2	37	15	5	61	27	4	20	1|2|	1	1	0	0	0	0	0	33	17	6	64	19	3.5	44	-4	2	1	3	-8	-0.5	24	itching	itching	rash	발진	0	0	0	0	0	0	0	0	0	0	1	0
24002[id]	1	73	2	6	24	20	8	59	9	3	11	1|2|3|7|	1	1	1	0	0	0	1	23	20	11	48	32	3	23	-1	0	3	-11	23	0	12					0	0	0	0	0	0	0	0	0	0	0	0
01-005[id]	1	68	2	9	13	22	9	68	0	1.5	12		0	0	0	0	0	0	0	24	23	11	69	0	2	13	11	1	2	1	0	0.5	1	skin eruption				0	0	0	0	0	0	0	0	0	0	0	0
01-011[id]	1	61	2	6	18	18	11	68	14	3.5	17		0	0	0	0	0	0	0	16	19	15	68	4	2.5	12	-2	1	4	0	-10	-1	-5	skin eruption				0	0	0	0	0	0	0	0	0	0	0	0
01-021[id]	1	84	2	6	12	24	12	45	3	6	10	1|5|	1	0	0	0	1	0	0	22	24	14	33	4	5.5	13	10	0	2	-12	1	-0.5	3	rash	skin eruption			0	0	0	0	0	0	0	0	0	0	0	0
01-034[id]	1	88	2	6	19	21	12	52	0	2.5	20	1|7|	1	0	0	0	0	0	1	20	19	4	49	0	2.5	19	1	-2	-8	-3	0	0	-1	itching	rash			0	0	0	0	0	0	0	0	0	0	1	0
01-036[id]	1	84	2	6	27	17	10	67	4	4	8	7	0	0	0	0	0	0	1	25	19	12	70	2	3	4	-2	2	2	3	-2	-1	-4	skin eruption	rash			0	0	0	0	0	0	0	0	0	0	0	0
01-043[id]	1	73	2	5	22	16	4	56	28	4.5	23	4|7|	0	0	0	1	0	0	1	22	17	7	58	49	4.5	18	0	1	3	2	21	0	-5	rash				0	0	0	0	0	0	0	0	0	0	0	0
04-006[id]	1	79	2	12	13	26	14	67	15	4	42	1|2|	1	1	0	0	0	0	0	12	27	13	65	4	2	2	-1	1	-1	-2	-11	-2	-40	itching				0	0	0	0	0	0	0	0	0	0	1	0
14_006[id]	1	65	2	6	19	21	14	61	9	2.5	24	1	1	0	0	0	0	0	0	17	23	14	62	23	2.5	22	-2	2	0	1	14	0	-2	itching	rash			0	0	0	0	0	0	0	0	0	0	0	0
15-008[id]	1	76	1	16	11	26	18	75	0	1.5	3	1|2|7|	1	1	0	0	0	0	1	7	27	17	73	14	1.5	20	-4	1	-1	-2	14	0	17					0	0	0	0	0	0	0	0	0	0	0	0
18-009[id]	1	69	2	6	38	15	5	49	63	9	75	6|7|	0	0	0	0	0	1	1	32	15	7	42	62	6	54	-6	0	2	-7	-1	-3	-21	itching				0	0	0	0	0	0	0	0	0	0	1	0
20-003[id]	1	85	2	0.5	38	14	6	64	13	4	9	1	1	0	0	0	0	0	0	28	14	9	68	9	3	26	-10	0	3	4	-4	-1	17	rash	itching			0	0	0	0	0	0	0	0	0	0	1	0
20-005[id]	1	83	1	9	21	23	10	39	2	3	49	4|7|	0	0	0	1	0	0	1	24	23	9	42	5	3.5	47	3	0	-1	3	3	0.5	-2	itching				0	0	0	0	0	0	0	0	0	0	1	0
20-012[id]	1	82	1	4	30	20	10	65	6	3	22	7	0	0	0	0	0	0	1	15	24	12	60	0	2	11	-15	4	2	-5	-6	-1	-11	itching	itching			0	0	0	0	0	0	0	0	0	0	1	0
20-015[id]	1	80	2	0.5	31	16	7	57	7	6	15	1|2|	1	1	0	0	0	0	0	35	19	7	62	7	6	13	4	3	0	5	0	0	-2	rash	itching	nausea	rash	0	0	0	0	0	0	0	0	0	0	1	1
01-001[id]	2	79	2	0	20	22	13	53	3	4.5	14	1|2|	1	1	0	0	0	0	0	20	23	11	63	0	2	1	0	1	-2	10	-3	-2.5	-13					0	0	0	0	0	0	0	0	0	0	0	0
01-002[id]	2	74	2	6	19	21	10	61	13	2.5	10		0	0	0	0	0	0	0	20	21	10	60	8	2.5	12	1	0	0	-1	-5	0	2	itching				0	0	0	0	0	0	0	0	0	0	1	0
01-010[id]	2	78	2	6	24	21	8	64	7	2	2	1|2|7|	1	1	0	0	0	0	1	26	18	8	66	0	1.5	0	2	-3	0	2	-7	-0.5	-2					0	0	0	0	0	0	0	0	0	0	0	0
01-020[id]	2	76	1	16	14	25	14	41	36	6.5	43	2|3|4|7|	0	1	1	1	0	0	1	18	27	15	40	35	1	44	4	2	1	-1	-1	-5.5	1	itching				0	0	0	0	0	0	0	0	0	0	1	0
01-027[id]	2	77	1	11	15	26	11	70	3	2.5	4	1	1	0	0	0	0	0	0	10	24	12	60	0	3.5	18	-5	-2	1	-10	-3	1	14					0	0	0	0	0	0	0	0	0	0	0	0
01-029[id]	2	76	1	15	13	26	14	64	6	3.5	3	2	0	1	0	0	0	0	0	18	27	15	59	0	1.5	1	5	1	1	-5	-6	-2	-2					0	0	0	0	0	0	0	0	0	0	0	0
01-032[id]	2	84	2	6	23	23	9	60	0	2.5	17	6	0	0	0	0	0	1	0	28	16	9	25	0	5	17	5	-7	0	-35	0	2.5	0	fracture	itching			0	0	0	0	0	0	0	0	1	0	1	0
01-033[id]	2	84	2	6	24	19	11	49	15	5	18	7	0	0	0	0	0	0	1	27	22	12	24	11	7	26	3	3	1	-25	-4	2	8	itching				0	0	0	0	0	0	0	0	0	0	1	0
01-038[id]	2	78	2	2	34	12	7	58	1	4.5	9	2	0	1	0	0	0	0	0	28	15	4	66	8	4.5	18	-6	3	-3	8	7	0	9					0	0	0	0	0	0	0	0	0	0	0	0
01-041[id]	2	77	2	5	30	17	4	64	1	2	2	1|7|	1	0	0	0	0	0	1	29	19	4	64	1	3	6	-1	2	0	0	0	1	4					0	0	0	0	0	0	0	0	0	0	0	0
03-015[id]	2	84	2	2	42	11	4	19	36	14	55	1	1	0	0	0	0	0	0	35	11	1	10	18	14	51	-7	0	-3	-9	-18	0	-4					0	0	0	0	0	0	0	0	0	0	0	0
04-004[id]	2	78	2	0	18	18	10	67	29	7	28	1	1	0	0	0	0	0	0	27	22	7	65	1	4	15	9	4	-3	-2	-28	-3	-13					0	0	0	0	0	0	0	0	0	0	0	0
04-007[id]	2	83	2	12	23	20	9	51	1	5	18	1	1	0	0	0	0	0	0	23	23	15	56	5	5	8	0	3	6	5	4	0	-10					0	0	0	0	0	0	0	0	0	0	0	0
04-008[id]	2	68	2	0	26	19	13	67	1	5	9	1|2|4|7|	1	1	0	1	0	0	1	20	22	12	72	0	5	10	-6	3	-1	5	-1	0	1	itching	itching	rash		0	0	0	0	0	0	0	0	0	0	1	0
04-009[id]	2	77	1	12	26	18	13	45	46	6	41	7	0	0	0	0	0	0	1	24	13	8	53	56	6	40	-2	-5	-5	8	10	0	-1	nausea	vomiting	dyspnea		0	0	0	0	1	0	0	0	0	0	0	1
04-015[id]	2	72	2	6	23	21	14	65	0	4.5	28	1|2|7|	1	1	0	0	0	0	1	14	24	13	60	0	4	28	-9	3	-1	-5	0	-0.5	0					0	0	0	0	0	0	0	0	0	0	0	0
04-017[id]	2	75	2	6	25	17	8	71	6	5	6	2|7|	0	1	0	0	0	0	1	28	21	9	66	7	5	16	3	4	1	-5	1	0	10	fracture(lumbar compression)				0	0	0	0	0	0	0	0	1	0	0	0
05-008[id]	2	78	2	2	40	10	5	43	10	11	3	1|3|7|	1	0	1	0	0	0	1	22	14	11	47	4	9	24	-18	4	6	4	-6	-2	21					0	0	0	0	0	0	0	0	0	0	0	0
10-001[id]	2	77	2	1	13	25	10	71	8	3.5	20	1|7|	1	0	0	0	0	0	1	10	24	10	67	2	3.5	14	-3	-1	0	-4	-6	0	-6					0	0	0	0	0	0	0	0	0	0	0	0
10-005[id]	2	76	2	4	16	18	13	69	0	4	1	1	1	0	0	0	0	0	0	10	22	12	73	0	3.5	28	-6	4	-1	4	0	-0.5	27					0	0	0	0	0	0	0	0	0	0	0	0
10-007[id]	2	86	2	0	33	16	11	63	4	4	17		0	0	0	0	0	0	0	35	13	8	62	2	4.5	36	2	-3	-3	-1	-2	0.5	19					0	0	0	0	0	0	0	0	0	0	0	0
10-008[id]	2	80	2	0	24	19	6	54	4	4	24	7	0	0	0	0	0	0	1	22	20	4	64	3	4	33	-2	1	-2	10	-1	0	9					0	0	0	0	0	0	0	0	0	0	0	0
10-011[id]	2	76	2	6	14	24	7	64	5	3.5	12	1	1	0	0	0	0	0	0	26	24	7	67	2	4	5	12	0	0	3	-3	0.5	-7					0	0	0	0	0	0	0	0	0	0	0	0
10-012[id]	2	81	2	3	29	16	7	69	5	7	19	1|4|7|	1	0	0	1	0	0	1	33	19	5	70	1	5.5	9	4	3	-2	1	-4	-1.5	-10					0	0	0	0	0	0	0	0	0	0	0	0
10-015[id]	2	73	2	3	26	24	10	59	0	3.5	10	1|2|6|	1	1	0	0	0	1	0	27	20	11	78	2	3.5	6	1	-4	1	19	2	0	-4					0	0	0	0	0	0	0	0	0	0	0	0
14_011[id]	2	70	1	12	14	23	15	49	32	2.5	28		0	0	0	0	0	0	0	13	25	14	55	15	2.5	31	-1	2	-1	6	-17	0	3					0	0	0	0	0	0	0	0	0	0	0	0
14_016[id]	2	65	1	12	26	20	12	76	8	7	35	3	0	0	1	0	0	0	0	25	19	12	67	26	7	31	-1	-1	0	-9	18	0	-4					0	0	0	0	0	0	0	0	0	0	0	0
15-001[id]	2	62	2	9	14	21	14	48	19	4.5	34	1|4|7|	1	0	0	1	0	0	1	9	25	17	47	19	4.5	50	-5	4	3	-1	0	0	16					0	0	0	0	0	0	0	0	0	0	0	0
15-003[id]	2	74	2	12	24	17	12	58	8	3	28	1|2|	1	1	0	0	0	0	0	17	22	12	47	10	4	30	-7	5	0	-11	2	1	2					0	0	0	0	0	0	0	0	0	0	0	0
15-005[id]	2	88	2	6	15	23	15	73	1	3.5	7	1|2|	1	1	0	0	0	0	0	21	25	13	71	0	3.5	4	6	2	-2	-2	-1	0	-3					0	0	0	0	0	0	0	0	0	0	0	0
15-013[id]	2	55	1	20	23	21	11	78	0	3	3	2	0	1	0	0	0	0	0	26	16	11	69	1	4	18	3	-5	0	-9	1	1	15					0	0	0	0	0	0	0	0	0	0	0	0
15-015[id]	2	75	2	6	15	22	15	74	10	2	41	1	1	0	0	0	0	0	0	22	15	9	66	17	2.5	39	7	-7	-6	-8	7	0.5	-2					0	0	0	0	0	0	0	0	0	0	0	0
15-016[id]	2	75	1	16	18	26	10	69	2	3.5	3	3	0	0	1	0	0	0	0	22	24	9	60	0	3.5	2	4	-2	-1	-9	-2	0	-1					0	0	0	0	0	0	0	0	0	0	0	0
16-003[id]	2	78	1	14	15	26	13	69	4	4.5	8	1|2|3|4|	1	1	1	1	0	0	0	13	24	15	71	6	4.5	20	-2	-2	2	2	2	0	12					0	0	0	0	0	0	0	0	0	0	0	0
16-005[id]	2	82	1	16	24	24	12	58	31	4.5	16	1|7|	1	0	0	0	0	0	1	21	24	13	73	19	4.5	20	-3	0	1	15	-12	0	4	itching	rash			0	0	0	0	0	0	0	0	0	0	1	0
17-003[id]	2	71	2	5	24	16	5	55	0	4.5	3		0	0	0	0	0	0	0	24	15	4	69	3	4.5	23	0	-1	-1	14	3	0	20					0	0	0	0	0	0	0	0	0	0	0	0
17-011[id]	2	73	1	12	20	26	16	64	0	1	11	1|4|7|	1	0	0	1	0	0	1	19	25	15	68	0	1.5	2	-1	-1	-1	4	0	0.5	-9					0	0	0	0	0	0	0	0	0	0	0	0
18-006[id]	2	77	1	7	22	23	10	57	0	1	5	1|7|	1	0	0	0	0	0	1	21	23	12	58	1	1	5	-1	0	2	1	1	0	0					0	0	0	0	0	0	0	0	0	0	0	0
18-012[id]	2	83	1	6	13	19	10	44	9	5	12	7	0	0	0	0	0	0	1	19	20	14	36	8	3.5	7	6	1	4	-8	-1	-1.5	-5	nausea				0	0	0	0	0	0	0	0	0	0	0	1
19-005[id]	2	67	2	0	13	18	8	69	1	3	13	2|3|7|	0	1	1	0	0	0	1	16	18	8	68	1	4	11	3	0	0	-1	0	1	-2					0	0	0	0	0	0	0	0	0	0	0	0
20-001[id]	2	83	2	6	23	19	5	67	0	2.5	24	1	1	0	0	0	0	0	0	23	18	5	57	0	2.5	27	0	-1	0	-10	0	0	3	rash	itching			0	0	0	0	0	0	0	0	0	0	1	0
20-004[id]	2	78	2	9	15	21	10	65	0	1.5	3	1|2|3|	1	1	1	0	0	0	0	20	22	4	42	14	3	11	5	1	-6	-23	14	1.5	8					0	0	0	0	0	0	0	0	0	0	0	0
20-010[id]	2	71	1	5	23	23	14	48	10	2.5	21	1|2|	1	1	0	0	0	0	0	22	19	10	60	6	2.5	11	-1	-4	-4	12	-4	0	-10					0	0	0	0	0	0	0	0	0	0	0	0
20-013[id]	2	73	2	0.5	38	19	7	68	3	5	6		0	0	0	0	0	0	0	39	19	5	69	2	5	7	1	0	-2	1	-1	0	1	epigastric pain				0	0	0	0	0	0	0	1	0	0	0	0
21-008[id]	2	77	2	1	33	16	8	33	14	7.5	32		0	0	0	0	0	0	0	29	20	11	47	18	3.5	14	-4	4	3	14	4	-4	-18					0	0	0	0	0	0	0	0	0	0	0	0
21-012[id]	2	80	2	9	25	20	12	55	7	4	17	2	0	1	0	0	0	0	0	23	18	15	56	4	4	33	-2	-2	3	1	-3	0	16					0	0	0	0	0	0	0	0	0	0	0	0
21-022[id]	2	81	2	1	37	13	3	44	38	9	30		0	0	0	0	0	0	0	34	12	7	58	15	8	16	-3	-1	4	14	-23	-1	-14					0	0	0	0	0	0	0	0	0	0	0	0
21-028[id]	2	76	2	0.5	30	18	6	45	33	6	53	1|6|7|	1	0	0	0	0	1	1	13	24	10	72	4	1.5	0	-17	6	4	27	-29	-4.5	-53					0	0	0	0	0	0	0	0	0	0	0	0
21-030[id]	2	70	2	0.5	25	17	6	65	6	2.5	13	1|4|	1	0	0	1	0	0	0	27	18	7	65	0	3	15	2	1	1	0	-6	0.5	2					0	0	0	0	0	0	0	0	0	0	0	0
22-009[id]	2	69	1	16	27	26	13	69	0	2.5	14	2|4|	0	1	0	1	0	0	0	36	26	15	71	0	5	16	9	0	2	2	0	2.5	2					0	0	0	0	0	0	0	0	0	0	0	0
23-014[id]	2	71	2	11	28	20	13	73	2	3	12	7	0	0	0	0	0	0	1	28	18	14	70	4	3	18	0	-2	1	-3	2	0	6					0	0	0	0	0	0	0	0	0	0	0	0
23-017[id]	2	66	2	6	21	22	10	75	0	2.5	2		0	0	0	0	0	0	0	12	23	12	73	0	2.5	10	-9	1	2	-2	0	0	8					0	0	0	0	0	0	0	0	0	0	0	0
23-024[id]	2	59	1	12	20	23	15	73	5	2.5	38		0	0	0	0	0	0	0	20	22	15	65	13	4.5	45	0	-1	0	-8	8	2	7					0	0	0	0	0	0	0	0	0	0	0	0
23-025[id]	2	77	1	0	33	10	6	44	3	6	35		0	0	0	0	0	0	0	51	6	4	33	11	6	42	18	-4	-2	-11	8	0	7					0	0	0	0	0	0	0	0	0	0	0	0
01-012[id]	2	74	1	6	18	22	15	55	12	2.5	25	4	0	0	0	1	0	0	0	20	23	9	45	11	5	47	2	1	-6	-10	-1	2.5	22	itching	rash			0	0	0	0	0	0	0	0	0	0	1	0
01-014[id]	2	72	2	6	19	25	12	62	25	3.5	29	1|2|7|	1	1	0	0	0	0	1	21	28	10	67	5	3	3	2	3	-2	5	-20	-0.5	-26	itching	headache			0	0	0	0	0	0	0	0	0	1	1	0
01-031[id]	2	79	1	5	21	20	12	30	0	3.5	16	1	1	0	0	0	0	0	0	23	23	9	39	0	4	16	2	3	-3	9	0	0.5	0	headache	headache			0	0	0	0	0	0	0	0	0	1	0	0
18-010[id]	2	69	2	9	27	17	7	62	3	2.5	1	1|2|3|4|7|	1	1	1	1	0	0	1	15	20	6	62	0	1.5	1	-12	3	-1	0	-3	-1	0	itching	rash	itching		0	0	0	0	0	0	0	0	0	0	1	0
18-011[id]	2	81	2	12	19	24	9	67	3	2	15	1|3|	1	0	1	0	0	0	0	19	23	13	67	0	2	2	0	-1	4	0	-3	0	-13	rash	itching			0	0	0	0	0	0	0	0	0	0	1	0
18-015[id]	2	78	2	0	33	13	3	58	10	4	32	1	1	0	0	0	0	0	0	35	11	3	53	0	4	46	2	-2	0	-5	-10	0	14	rash	itching			0	0	0	0	0	0	0	0	0	0	1	0
18-017[id]	2	84	1	12	28	20	13	58	8	4	13	1	1	0	0	0	0	0	0	27	20	14	58	14	4	13	-1	0	1	0	6	0	0					0	0	0	0	0	0	0	0	0	0	0	0
20-014[id]	2	78	2	0.5	34	16	7	55	4	4.5	12	6	0	0	0	0	0	1	0	32	16	6	55	1	4.5	10	-2	0	-1	0	-3	0	-2	itching	itching			0	0	0	0	0	0	0	0	0	0	1	0
[truncated: 15 more columns]
